# Supplementary material for: Involvement of Th1Th17 Cell Subpopulations in the Immune Responses of Mothers Who Gave Birth to Children with Congenital Zika Syndrome (CZS)
Source: MDPI journal article supplement (doi:10.3390/v14020250), 2022-01-26
Supplement: s1 [file s1]

**Table S1.** Antibodies used in BD FACS ARIA IIu Flow Cytometer.

| <b>Target Molecule</b> | <b>Fluorochrome</b> | <b>Clone</b> | <b>Company</b> | <b>Catalog #</b> |
|------------------------|---------------------|--------------|----------------|------------------|
| IFN- $\gamma$          | FITC                | 4S.B3        | eBioscience    | 11-7319-82       |
| IL-17A                 | PE                  | BL168        | BioLegend      | 512306           |
| CCR4                   | PE-CF594            | 1G1          | BD             | 565391           |
| CCR7                   | PerCP Cy5.5         | G043H7       | BioLegend      | 353220           |
| CXCR3                  | PECy7               | 1C6          | BD             | 560831           |
| CD3                    | AlexaFluor 700      | UCHT1        | BD             | 557943           |
| CD4                    | APCef780            | RPA-T4       | eBioscience    | 47004942         |
| CD45RA                 | eF450               | HI100        | eBioscience    | 48045842         |
| CCR6                   | BV510               | 11A9         | BD             | 563241           |
| T-bet                  | PE                  | 4B10         | BD             | 561265           |
| CD127                  | PerCP Cy5.5         | A019D5       | BioLegend      | 351322           |
| GATA 3                 | PECy7               | L50-823      | BD             | 560405           |
